# Supplementary material for: A modular CRISPR screen identifies individual and combination pathways contributing to HIV-1 latency
Source: PubMed Central journal article supplement (PMC9907829; doi:10.1371/journal.ppat.1011101), 2023-01-27

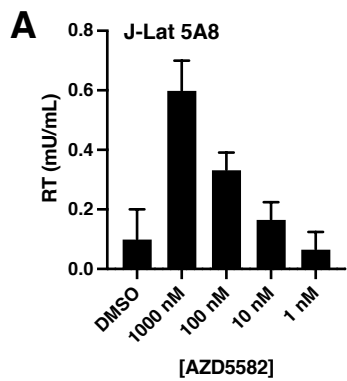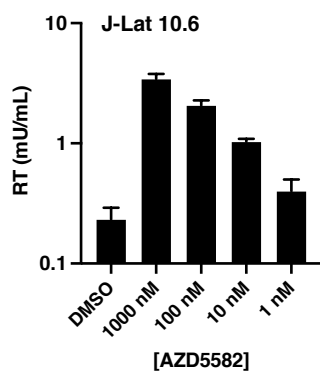

Supplement: ppat.1011101.s010.pdf [file ppat.1011101.s010.pdf]
